# Supplementary material for: Identification of RNF213 as a Susceptibility Gene for Moyamoya Disease and Its Possible Role in Vascular Development
Source: PLoS One. 2011 Jul 20;6(7):e22542. doi: 10.1371/journal.pone.0022542 (PMC3140517; doi:10.1371/journal.pone.0022542)
Supplement: Table S1 — Demographic feature of familial participants. (XLS) [file pone.0022542.s014.xls]

## Sheet: Table S1
Table S1. Demographic feature of familial participantsa
	Familial participants
	Japanese		Korean
No. of participantsb	185		5
No. of pedigrees	41		1
Clinical status
Bilateral	90		2
Mean of age of onset (years+SD)	24.6+20.6		19.0+12.8
Female : Male	64:26		1:1
No.of definitive moyamoya disease patients per family	2.19512		2
No.of cases with phenotypes associated with moyamoya disease
Unilateral	9		0
Stenosis	6		0
a Details should be referred to Figure S1
b Those who donated blood including index cases
