# Supplementary material for: Identification of RNF213 as a Susceptibility Gene for Moyamoya Disease and Its Possible Role in Vascular Development
Source: PLoS One. 2011 Jul 20;6(7):e22542. doi: 10.1371/journal.pone.0022542 (PMC3140517; doi:10.1371/journal.pone.0022542)
Supplement: Table S2 — Summary of demographic and clinical profiles of cases and controls. (XLS) [file pone.0022542.s015.xls]

## Sheet: Table S2
Table S2. Summary of demographic and clinical profiles of unrelated casesa and controls
	Japanese			Korean			Chinese
Cases
No. of participants	7	113		3	34		52
Age at participation (years+SD)	12.1±13.4	29.9±21.4		29.7±14.6	38.7±14.1		22.7±17.9
Female: Male	5:2	78:35		2:1	25:9		25:27
Family history	positive	negative		positive	negative		negative
Age (y)	Age of onset (y)
-10	5	35		0	0		16
10-20	0	8		1	4		10
20-30	0	8		1	6		8
30-40	2	15		0	5		6
40-50	0	28		1	11		10
50-60	0	10		0	5		1
60-	0	9		0	3		1
Young onset (<15 year)	5	41		0	1		23
Adult onset (15 year≦)	2	72		3	33		29
	Clinical symptoms
Cerebral infarction	3	12		1	13		4
TIA	2	47		0	7		19
Hemorrhage	1	26		0	0		2
Unknown stroke	0	0		2	12		10
Seizure	1	5		0	1		0
Headache	0	12		0	1		4
Asymptomatic	0	3		0	0		0
Other	0	8		0	0		13
Total	7	113		3	34		52
Controls
No. of participants	384			223			100
Age (y): Mean+SD	61.8±10.2			40.7±10.9			39.4±10.9
Female: Male	206:178			198:25			100:0
Angiographyb	384			46			NA
% Screening by angiography	100			20.6			NA
TIA: Transient Ischemic Attack; Other: including other onset types or unknown symptoms
NA: Not applicable
a All cases matched the RCMJ diagnostic criteria.
b Angiography: Conventional digital subtraction angiography, MRA, CTA and other
