# Supplementary material for: Identification of RNF213 as a Susceptibility Gene for Moyamoya Disease and Its Possible Role in Vascular Development
Source: PLoS One. 2011 Jul 20;6(7):e22542. doi: 10.1371/journal.pone.0022542 (PMC3140517; doi:10.1371/journal.pone.0022542)
Supplement: Table S3 — Primers used for amplification of RNF213 and PCMTD1 (Human build 37.1). (XLS) [file pone.0022542.s016.xls]

## Sheet: Table S3
Table S3. Primers used for amplification of RNF213 and PCMTD1 (Human build 37.1)
Gene Identification		Forward Primer (5' > 3')	Reverse Primer (5' > 3')	Position on Chr 17 (bp）		Annealing Tm
				Start	Stop
RNF213
NM_020914.4	AB537889
ex1	ex1	CACCATGAGCCTCACAGATG	ACTTCGCCAAGTCGGAAGGA	78233855	78235213	58
int1	int1	TGTACGAATGGCAACAACGGAA	AACACCTTCAATGACTCCCCA	78235098	78235935	58
		TACTCCAGCCTGGGTGAAACT	TTCCCTGGCTTGACCTGTGT	78235779	78236550	58
		ACAAAAGGATAGCTTCCCAGA	ATTCAGCCAGCCTAGAACCAT	78236427	78237231	58
		AATCTGACTGCCAGCCCAGTA	TTTCCTCCTTGGAGACATGCTG	78236984	78237520	58
ex2	ex2	TTCTAGGCTGGCTGAATGAGG	AGATGGCTATTCAGAGCCACA	78237215	78237734	58
int2	int2	AGTTCTGCAGCCAGTGCGGAGA	AACCAGCCAGCATCACTGTATT	78237527	78239343	56
		CAGGAATTTGGTGACTCTGTACATG	CAACTTGGCTAACCATTTGGTG	78239267	78240721	56
		GGAAGGCATGTTGAAAGCTGAGATA	GGCTGTGGTTTAAGGGAATGTT	78240654	78241373	56
		ATGATTAGAGAGTGAAACAGCCTT	AGCACGATTCACAATAGCCAAG	78241278	78242037	56
		CTTCAACGTCCATTGTTGGATAG	TTCTTTCTTTCCCAGCTTGCAG	78241977	78242690	56
		TGGCTCACACAATCACAAGGT	GGTCTCTTAACTTCCAAAGAGATGC	78242628	78244439	56
		TCGTTGGGTGGAAATGGCACT	GTTTCCAGCACCTGGTTTCGT	78244351	78245239	56
		TCTTGGCTACGCCAACACTGAGTA	ATGTGGCACAAAAGCCCTCA	78245132	78246206	56
		TCACAGTTCTGCAGACTGAGAAGT	CGCCATTGTGGAGTTATTGTTC	78246139	78247068	56
ex3	ex3	TCATGTTAGCAGGCCCAAT	ATGAATCAGGTGCAGAAGGG	78246899	78247364	58
int3	int3	TCATGTTAGCAGGCCCAAT	CTTGCACCCTCAATGCAAAGA	78246899	78247854	56
		ATACTCGTGTGTCTCCCAGAAG	ACTCTCTCAGTCTCTGTAGACTGGC	78247749	78249444	56
		TCGAAAAAGACCTGAGAAGACCTC	ACGCCTGTAATCCCAACATTCT	78249346	78249742	56
		TCTCGATCTCCTGACCTTGTGA	AAAAAATAGGGCAGGCG	78249679	78250206	56
		TTGAACTCCTGACTTCAGGTGC	TTTGAGAGTGAGTCTCGCTCTGTT	78250117	78250857	56
		ATGCCTGTAATCCCAGCTACTT	TTGAGACAGAGTCTCACTGTCGC	78250727	78251396	56
		TGCCTGTAATCCCAGCTACTC	AGTAGCCTCTCCAGAGGAAGAAT	78251269	78251877	56
		TTGGCACAGCCATCCTCCACT	ACAGCAGCATCTACCAAAACCT	78251781	78252597	56
ex4		TTACGTGGACTTGTCCTGCA	CCTGAATCAGCGTTGCTCTTT	78252325	78252883	58
int4		TTTGGGCAGAATGCTCCCT	TATGAAGCTCCCTTGCTTTTCC	78252727	78253694	58
		CTGCCCCAAATCCTGACTTTT	TATGCCTGTAATCCCTGCACTT	78253562	78254536	58
		CACCACCACACCCAATTAAT	TGTGAGTTGGCTGTGTGTGTT	78254401	78255412	58
		CCAACATACATACACCCCACTCA	AGATTGTGCCACTGCACTCC	78255280	78256265	58
		CGACTGTATACCAGCTTGATTCAA	ATCCAGTTCCTGGAAGACCACT	78256150	78257226	58
		CAGTCCTCACCGAGAAGTAAGT	CAAAGTGCTGTGATTACAGGTGTG	78257025	78257781	58
		TGCCAGAGCCTGATTATGTCAT	TTGAGATGGAGTCTCACTCTGTCA	78257611	78258344	58
		AAAATTAGCCGGGCATGA	AGAGTTGTAGGACACTGCCTGGTA	78258010	78258966	58
		AAACACCTGCTGTGTGTGGA	TGCTGAAATGGCACACTTGGT	78258881	78259926	58
		TTGAGATGGAGTCTCACTCTGT	TTCCACGTTTTATGCACCTC	78259788	78260845	58
		TGAACCTGGATGTGCCTTTG	CTAAACAGAAAGAGAGACACTCAC	78260709	78261613	58
ex5	ex4	TTAGGTACTTTGGTCGAGCCA	AAGCAACGCCAGCACCTT	78261492	78262244	58
int5	int4	TATGGTGAGTCATCCGGGAGA	TGGCTCAGCTACAGCATCAA	78262159	78262455	58
ex6	ex5	TATGGTGAGTCATCCGGGAGA	GCCAGAGCTTTGTCTGAATCA	78262159	78262682	58
int6	int5	AATGAAACAGCCACCAGCAA	TGCACTTCTGTTCTTCCCCT	78262506	78263571	58
ex7	ex6	TCGCAGGAGAATTGCTTGA	AACTTGCCAAAACAGCTGAC	78263291	78263756	56
int7	int6	ATGTCCAGGAAGTGAAGGCAA	ATGGAGGTCAGGATTGAATGG	78263615	78264450	58
ex8	ex7	ACAGATCTCACGGGAATCAGA	TCACAGGCTGGGCATCCTAT	78264325	78264590	58
int8	int7	AGCAATATCTGTGAGCTGCAC	TGTATTTATCTAGGTGCTTCTTGGA	78264499	78265497	58
ex9	ex8	TGTTGGGATTTCAGGCATG	TGTCACTGAACCTGGAGGCT	78265286	78265784	58
int9	int8	TCTCTGGAGAGCACAGACTTTG	GTCCAGGTGATCAACACAGTCA	78265700	78266548	58
		CCTCTGCCCATCTGTCAATAGA	TGGCATTTATCAGAGCAGGA	78266397	78267306	58
		GGCATTAGTCCGGTAATTCCATAT	TTGGTTTCCTCTGTACTAGGAACG	78267218	78268103	58
		GCAATGGAGCCTAAGAACA	GATGTGGTTCATGACTTTCTGGA	78267967	78268589	58
ex10	ex9	CTGCCCCATTTACTCCATATC	ACACATTCCCATTTGCAACC	78268405	78268913	58
int10	int9	TTTATGAAGGACAGGCACAGC	GGCAATGGTACCACGTGTTTT	78268750	78269406	58
ex11	ex10	AATGGGGTCTGCTGCCCTA	CAGTGAGTGGTAAAATCACGGG	78269256	78269750	58
int11	int10	TCACCAGATGAGTTTCACCGT	CTCACGTTCAAATCAACACACG	78269561	78270414	58
		CAGGAAACACAGTGTGACTGTCCT	AAACGTAAGGGTTGAGCCTA	78270285	78270954	58
		TTAGTGCCGGGGCTTAAAGT	ACCGAATCCCCACAACAAA	78270862	78271918	58
ex12	ex11	TTACTGTTGCCAGATGGCCT	AGACGGGTTTTCACCATGTT	78271985	78272597	58
int12	int11	TCACCGTTCCGGGAACAAA	TCAATACAAGGCTGGCACTCTC	78272290	78273057	58
		CCAAATATGGATTCGTGGGTG	ACCATGGAATACTATGCAGCCA	78272876	78273727	58
		CGGTATTTGGTTCTCGTTCCT	AGACTGAGGCAGGACAATCACTT	78273610	78274475	58
		GTTTCGCTTTATCACCCAGG	AAATCCCCCTATCCAACGTGTA	78274380	78275236	58
		GAGAAGTCCTTAAAAGCACAGGC	TATCCACTAGCCAACCTTTGG	78275074	78275969	58
		ATATTCCCACTCATACGTGGATG	AATCTGGACTTCTACCACTGCA	78275849	78276619	58
		AATAGTTAGGCATGGTGGGGTG	CTGAGCATCATGCTTTATGAGG	78276510	78277203	58
		AGAGGTAATGACTGCAGCACTCT	GCCTTTCTAGGTAAATATGGACC	78277088	78277832	58
		GAAGAGGCCACTAGATGATCAAG	TTTCAGCTGGGGAAGCTGAGT	78277753	78278644	58
		CTCCAGTTTACCATGTTAACTCC	AATTCACTGCTGGCCATTCT	78278527	78279365	58
		TTGAACTCCCAACCTCAGGTG	TCAGCAAATGCTGCTTCTCTCT	78279196	78280095	58
ex13	ex12	CGAGTCAGCCTCCCAAGTATT	CTCCCAAAGTGCTGGGATTC	78279876	78280414	58
int13	int12	TTGTGTCTGAAGTCGGCTCT	AGAAGAGAAGTGGGCCACATA	78280271	78281139	58
ex14	ex13	TCGTAGCTGCCATTCTTCCTT	AGAAGAGAAGTGGGCCACATA	78280692	78281139	58
int14	int13	TCGTAGCTGCCATTCTTCCTT	AAAAATTAGCCAGGCGTGGT	78280692	78281521	58
		CCATCTTGGCTCACTGCAA	TCACAGGTGCTGGATCAACAT	78281412	78282056	58
		ACCACTGAAATGTGCCAGTGAG	CCCCGCAAAGAGTTAAGAGAAA	78281927	78282814	58
ex15	ex14	GGTCAAACAAATGCCCTGTT	TCAAGCAGGTGCACAAGAAA	78282699	78283123	58
int15	int14	AAAGGAAACAGACTGATTCCCG	GAAACTCATGAACTCAAGTGGG	78283041	78284014	58
		TCTGAGCTCTGTCTGTGTGGTG	TCCAGAGAACGTGATCATCTCA	78283927	78284814	58
		ATTACAGGCATGAGCTACTGCA	CTCCCAAGTAGCTGGGATTACAA	78284623	78285825	58
		AGAGGTTAGGAGTTCGAGACCA	TCATCCTCGGCTGTGGACT	78285710	78286784	58
ex16	ex15	GAATGGAAGTGCTTTGGGAA	ATCTGTCTGCCTCAGAGCCA	78286640	78287152	58
int16	int15	GAACATGCCTGACCTAAGAAAAG	ACAGAGCATTACGGCAATACAGA	78289867	78290913	58
ex17	ex16	GCATGGCTGACTGTTGATGAA	GGGCTGGATCAGAAACAGAAA	78290831	78291229	58
int17	int16	AGAGATCTCAGCAGTGCCTCTC	TTGTGCCTATAAAGACCCCAGA	78291153	78291977	58
		AAGTCAAGTCACCTGTTTCCAG	TCCAGTGCTCTATGGGATGAAA	78291907	78292942	58
ex18	ex17	TGGGCCAGGAGAAGCTTAAA	AGTGATGACAGGGCCATCTGA	78292853	78293423	58
int18	int17	TTCTCTCCGGATTCCTCAGTG	CTCAGTGAAATAAGCCATACCCA	78293281	78294123	58
		GCTTCTGTGGCTTTCTCTGTT	TCCCATCTGGAAGACATCTCAT	78294039	78294948	58
		TACCCAAAATGCTTGAGACCAG	AGGCAGGAGAATTGCTTGAA	78294852	78295641	58
		TGGGTATGAAGTGGTATCTCCT	ATTAGCTGAACATGGTGGCACA	78295499	78296128	58
		AAAATTTCTGTGGGCCGGG	GCAAGAGAATGAAACAGAACCC	78296136	78296903	58
		TCTTACATGTAGGCCTTTGATCCA	AGAAATTGGCCAGGAATGGT	78296815	78297561	58
		TGTTAGACAGAGTCTCGCCCTG	GATACGGGAAAAGCATTTGAC	78297346	78298142	58
		TGCCCTTTATCAGTTTGTGG	AACCCCTGAAGGATACTGGTCT	78298034	78298855	58
ex19	ex18	TGGTGCTGGACACTTAAGGA	TTCCAGGGTCTCTCTGTCCAA	78298619	78299152	58
int19	in18	AGGTGGGAGGCAGAAGATTT	AGATCACAGCACTGCACTCCA	78299061	78299826	58
		AAGCTGTGGGGATCAAATAAC	AAGACTAAAGGAAATGGGAGGG	78299652	78300422	58
		TTCCTGGTGTTGTCCATTCTCT	ATACGCATGAACCACCTCACAT	78300293	78301041	58
		AGGTATGTCTGCATCCTCTGGT	GCATCCTCTGTGACATTTGCTA	78300912	78301655	58
ex20, int20, ex21	ex19, int19, ex20	GGGGGCAGAACAAGAGGTTAT	GATCTGCTACTGTGATCCATTC	78301518	78302362	58
int21	int20	TAGTCTCCTGAAGATGTGTGGGA	TCAAGGAAATTCAGACACTCGG	78302234	78302851	58
		CATTTCCTGTCAGATGCTGT	CAAGTAGTTGGGAATACAGGCA	78302747	78303524	58
		GAGGACTGCTTGAGTCTAGGAGTT	ACTTCAGGAGACAGGCCAACTT	78303402	78304225	58
		GTCTGGACATTCTTGTTTGTCTG	TCTGTTTAAGACACGGTCCAGG	78304103	78304938	58
		CCACCACGTCCAGCTAGTTT	AGACTTTCTCTCCTCACTTCTCTG	78304768	78305735	58
ex22	ex21	CTGAGAAAGAAATCCTAGCAGCTGT	ACAAAGCCCTTGGGATATTCAG	78305670	78306598	54
int22	int21	ATGGGCTTTGTGGCTTTGAA	AAAAATTAGCCGGGCGTG	78306497	78307020	58
		TTGAGATGGAGTCTCGCTCTGT	ATAAGAGTCTCACTCTGTCGCCC	78306865	78307491	58
		AGACAGGGTTTCACCGTGTT	AAAGCTCTACTGTGGACTGGAA	78307047	78307895	58
ex23	ex22	GTGGCAAATCTAGGCATTGAG	ATGGGAAATACTGTACCGGTGT	78307787	78308262	54
int23	int22	GTGTGGCGTTCCTAAACTCTTT	TCCTCTGCCAACGACATCTAA	78308129	78309120	58
		AGTGCAGGCGTGAGCAAGTA	GGACTATTCCACGATAGCACAA	78308985	78309930	58
ex24	ex23	CAAAAGATTAGGTGTTCCGGAC	GACCCTGCTACAGGTAGTTTACTTA	78309797	78310765	54
int24, ex25	int23, ex24	AGCCTGAGTGACAAAGTGAGACT	TAGATGCCTCTTTGGTTGATGG	78310671	78311495	58
ex25, int25, ex26	ex24, int24, ex25	AAGACTGTGAATGAGAGTCATGGG	GACCGGTACACCATTCTCAATATG	78311416	78312222	58
int26	int25	TCCTTACGATCCGTAGGATGA	AGTCTTGCATTGTTGCCCA	78312027	78312740	58
int26, ex27	int25, ex26	TCATGGTTCACACTTTGGGA	TGTCAAGGAAGTGCTCCATCT	78312491	78313223	58
ex27	ex26	TATGCTGTTCAGGACGTGGAT	AAGACCTTGTGCTGGCTGAAGG	78313060	78314013	58
		TCATCATGGAGCAGTCCATGAG	TACACTGCAGAGATGTTTGCTGA	78313506	78314401	56
int27	int26	GTGTGATTCATCTGTGGGTGTCAA	AACATGGTGAAACCCTGTCTCT	78314270	78314943	56
		TACTGGGATCACAGGCATGA	AACTAGTCAGGTGTGGTGGCGT	78314867	78315775	56
		GAGTGCAATGGCACGATCT	CTTCATTTTGTCGTGCAACCTC	78315656	78316972	56
ex28	ex27	GAACTCCTGACCTCAAGTGATCC	TGCGTGTGGAAACAAGGAATT	78316828	78317230	56
int28	int27	TCCTCAGTAAGTGCCCTCCAG	CAGTAAGACCAGAAAGAACCCAAG	78317120	78317878	55
ex29	ex28	TCATCAGGATCATCGTGACAAAG	CAGTAAGACCAGAAAGAACCCAAG	78317551	78317878	56
int29	int28	AAATCCTGGAAAGGAGGACGTCA	GGGAAGATGTCAAGAAAACTGAAC	78317766	78318518	55
ex30	ex29	GGAGGGTTAAGACACAAAAGCA	TTCTTGTGTCTGGGCAGTTTATC	78318405	78319253	56
		GAAGGTCATCAAGAGAGACGTCATG	TGACAAAGCTGCACTCATCTTCT	78319149	78320044	56
		CTGGTTGAGTCCATCAGCCTAGAT	ACGAAGCCGACCTTTTTGTG	78319936	78320780	56
		GTCTCTGTGGTGGTGTTAGATGAGGT	ATGGGGCTGACTTCCTCTGA	78320647	78321179	56
		GACATTGCACAGGCTGTCCT	AGCACCTGGTTAACTGGACCTACT	78321067	78322262	56
int30	int29	GATTTCCTTCAGGCACACCT	TTCCATCTGCTCCTCTCCTTTGTA	78322027	78322845	55
		TGATGAAAGGCTGTTGTGGA	TTGTTAGCAGCCTGGAGAAAGT	78322769	78323597	55
ex31, int31, ex32	ex30, int30, ex31	CATCGCAGGTTTCTAGGATCTGTCT	TTCAGTTTCCCTAATCCCACTTG	78323476	78324361	58
int32	int31	TTTGAAGATGGAATCCGTAGCGC	AAGATACGGTCCTCATTTTCTCG	78324153	78325538	55
ex33	ex32	AAAACTCATCGGAACGGGTG	ACAGAGCAAGACTCCATCTCAA	78325336	78325693	58
int33	int32	ACAGCCTATGTGGGCTTCCA	GATGTGGACAGACTGCCACAGC	78325579	78326762	56
ex34, int34, ex35	ex33, int33, ex34	AATGACAAGCCAGGGTGTGCAAT	AAGACCGTCACTGTGTGAGGAAA	78326646	78327617	58
int35, ex36, int36, ex37	int34, ex35, int35, ex36	GAGTGGTAACGCAATCACGTTT	AGGTTTGGAAAGAAACAGCTCAG	78327277	78328493	56
int37	int36	CTCCAATCTGGTGGCAGCAT	CTAAAATCCCTTCAGAAGGCGT	78328406	78329752	57
		TATTGAGGAAGGAGGGGTGCT	AATCGAGGTAGTCAGGGTGCT	78328872	78330322	57
		ACTTACAGACACCTTCCTCGTGA	GGCAGACAGAAAGATAATTGGTT	78329652	78331143	57
		TGCCCAGCCACCTTTTAATTCT	AGAGGAACCAGAGTGGCGGTC	78331006	78332052	57
ex38	ex37	AGTTATTGCTGTCGCTGTAGTGTG	TTAGGGTCCTGCTGTGTTCTGATA	78331946	78332339	56
int38	int37	AGTGACACGATGCTTCTGAACAT	CCTGAAAGCTGAAGTGGAAGCTAT	78332233	78332996	55
		CCCCACAATCTGTGCTCCTTAC	ACCCATCTGCTTTTCACTGTCA	78332846	78334085	55
ex39	ex38	GGTCTGAGAAGAGCTGGCATCAGT	ACCCATCTGCTTTTCACTGTCA	78333766	78334085	60
int39	int38	TCAGCACAGGTGAATCACAA	AGTGCGTCTAAGTCATGGCG	78334034	78335503	55
ex40	ex39	TACGAGCTCCCATTCAACAAG	AAACGTCTCCGTGTCTGCAT	78335417	78335765	54
int40	int39	TGAAGGATTTCATTCTCTTGACC	TTTCAGTTTCCTAGTGCAGGACC	78335636	78336943	55
ex41, int41, ex42	ex40, int40, ex41	AAACGGGACAGAATAGCACAC	TCTTCTCATGGACATGCCTG	78336769	78337676	54
int42	int41	ATGAGCACATGCAAGGCAG	GCAGATCACTGTCAGTGCTGTT	78337536	78338432	58
ex43	ex42	GTATGTCACATAGGGCTTGCTTGTA	GCAGATCACTGTCAGTGCTGTT	78338086	78338432	56
int43	int42	ACAAGGTGAGTACTTGGGCTG	TTGGGCTGCTCATACCCAT	78338349	78339183	58
		TTGGAGCACAGGAAGGTTT	TTGCCCATGATGTGGAGAAA	78339050	78340204	58
		TACCTTGAAGGGGAATTCCTG	AAAGGCTTCTGCAACTCATTCTC	78340057	78340951	58
		TCATTTGCTCTCAGACATATGC	TTCACGTCAGAGTTCTCTCGAA	78340784	78341573	58
ex44, int44, ex45	ex43, int43, ex44	TTGGCCCTGAATGTGGTGCT	TTCTCTGAGGTCAGGTTTTCTACC	78341456	78342064	60
int45	int44	CAGGTACAACACCCTTTCTCTC	ACAAGAAGTGGGTTGATCCTCA	78341941	78342600	58
		AAAGTGCAGGGATTACAGGCAT	TTTGAGACGGAGTTTCACTCTTG	78342493	78343201	58
ex46, int46, ex47	ex45, int45, ex46	GCTGTGCAAATCTCAAGTCATTCT	AAGCTCCCCAAGATCATGTACTA	78343222	78343785	56
in47	in46	TCTTCATCGCAGCGTTTTGT	TGTGCTTCCCATTTCCACAA	78343714	78344460	56
		ATGCACACGTGGTTTTCTTCA	TCTGTCCTGTGTGTGTGTGTGTAT	78344360	78345589	56
ex48	ex47	GGACAGCTGGTCTAAAATGTGAGT	CACGGAACAGAGCATTCGTTAA	78345467	78345898	56
int48	int47	GTAAGTGAACTCTCTCTTCCCTGA	TATGAGGGTATGTGGTGGGGAA	78345786	78347104	56
ex49, int49, ex50	ex48, int48, ex49	ATTGGCGACTGTAGAAGCTTG	TATGAGGGTATGTGGTGGGGAA	78346244	78347104	57
int50	int49	ATTGGCGACTGTAGAAGCTTG	TGAAAGCAAAGGCCACAAGA	78346244	78347401	58
		ATTTGCCCCAGCTTGTGA	AGGTTAGTTGGGGGTGAACAAT	78347257	78348246	58
ex51	ex50	GGCTGCCTTTAAACCTCGAA	CCATCACCCTGCATCATTTGACA	78348147	78348492	56
int51	int50	GGCTGCCTTTAAACCTCGAA	CAACGCATATTTAGCAGCCA	78348147	78349019	58
		GTGCCAGGAAAAGAGGAAATG	GCTTTGGGTTAAACAGCTTGGT	78348892	78349839	58
ex52	ex51	CGAGATCATGCCACTGCACT	GCTTTGGGTTAAACAGCTTGGT	78349451	78349839	57
int52	int51	GGGCTGTGTTCAAAGTCTCAGTAT	TTTTGGACCCTGAGGCACAA	78349688	78350879	58
ex53, int53, ex54	ex52, int52, ex53	TGGTGTCAGTGTATGTCTAAGAGCA	TTTTGGACCCTGAGGCACAA	78350024	78350879	57
int54	int53	TCCTTTGAGCTTCAAAGGGTG	TAGAAACCCTTAGCGCCATTG	78350794	78351770	58
ex55	ex54	GGATGCTCTGGACAGTCATTCTCA	TAGAAACCCTTAGCGCCATTG	78351436	78351770	56
int55	int54	GGATGCTCTGGACAGTCATTCTCA	AAGAGAGCCAGACATATCTCAACC	78351436	78352292	58
		GCCCTCCATACACAGTATCTGTAC	TTTTTATGAGACAGAGCCTCGC	78352180	78352999	58
		GCTAAGGTAGGAGGATTGCTTGA	AATATGACACAGGCCCACATGTA	78352890	78353643	58
ex56	ex55	CGGTGATAAGGAGGTGTTCAT	AATATGACACAGGCCCACATGTA	78353328	78353643	56
int56	int55	ATCTGCATTGACTGCCATGC	CGATGCTCTCAGTGGCAAAA	78353444	78354191	58
		CCATGCTGAGATGAATGTGGT	AAGCAGAGCCAAGTGAGTGA	78354017	78354763	58
ex57	ex56	AGGCTTTGTGGAACAGCAAGT	CAAAACGCATAGATGGCAGCTA	78354496	78354892	56
in57	in56	TTCTTTCCAGAGACAAGGCA	ATCCCTCACTGGAGGCTTAAT	78354621	78355382	58
ex58	ex57	TTCCGACTCTATGCTGGTGCT	ACAAGACAGCGAGCCTGCTT	78355242	78355599	57
in58	in57	TTCCGACTCTATGCTGGTGCT	TGATTGATCCTTTGACACG	78355242	78355935	58
		TGGCTAAGACCTGCGGTATT	TGCTTCCAGGATTCTGTCATT	78355778	78356399	58
		CACCTCAGGTACTTCTTTGCC	GAATCTGGGGCTCAGTCAAA	78356247	78357002	58
ex59	ex58	GTGGTAACAACAGGAACTACTTCA	CAACAGGCAAGGAGCATTCA	78356616	78356955	55
int59	int58	GGAAATCGCAGCTGTGATTTCT	TCTGGAAGTGAGGTATTGCTACA	78356837	78357449	58
ex60	ex59	AAACGCCCTAATATGCAGACAC	CAAAGCACTGGAATAGTCTGTTAAG	78357371	78357845	55
int60	int59	CAAAGAAAGAGTGCCCATCCT	TTCGACGTAGTGAAACTGCAT	78357689	78358434	58
		TTTGCTGTCTAGCAAGGATGA	TTAGGCTATAGAGCACCCATCA	78358301	78359092	58
ex61, int61, ex62	ex60, int60, ex61	CTGCATCACAGGAAATGACACTG	TGACGAGAAGAGCTTTCAGACGA	78358706	78359488	58
int62	int61	TGCTTCACAACAGGATCACA	GGCAAGAGGATCTCAAACTCA	78359353	78360122	58
ex63, int63, ex64	ex62, int62, ex63	TGTGTGTGGAGCTGATGGCT	AGGGAGGAGATACAGACCAGACT	78359949	78360815	55
int64	int63	GGAGTTCGATCTGGAGAAGATT	GTCCAACGTACAGGATGCTTTT	78360616	78361376	58
		ATTATAGGCGTGAGCCACTGC	AATCCATGGGCTCTCACAGTT	78361177	78361755	58
		AACTGCATCCCGTGACCTCAT	CGCTAGGGCAACAGGTATTT	78361593	78362151	58
		TTTCACCATGTTAGCCAGGA	ACAGGATCAGGTTTATCGGGAT	78361959	78362514	58
ex65, int65, ex66	ex64, int64, ex65	TTTTCCGGCTGCAGATTCTGTT	TTTTCAGGAGCGCCTAGAGT	78362325	78363275	56
int66	int65	AGGTGGTGAGATGCCAGAA	ATGAGCAGACAGGAACTGCCA	78362912	78363687	58
ex67, int67, ex68	ex66, int66, ex67	ATAGGACAGAGATGGCCTTCAC	GACAAAAAGCAGGAAATGGGA	78363468	78364118	55
int68	int67	TCAGTTCAAGGTACAAAGCGGA	AAAGTGCTGGGATTACAGGGTA	78363828	78364620	58
		CCACTACACCCAGCCTAAAAG	ATGGTTGGCACCTGTAATCC	78364483	78365224	58
		ATTTCCCCATTTACCGTGAG	TCCTGGGATAAGGAAGATCCT	78364999	78365547	58
		TTCATCTTCTCTGCCGTGTG	TTGGTGAGGAAGACTGGAGTT	78365419	78365991	58
		AAAGTGCTAGGATTACAGGCG	CAGAAATCCTGAGGAGCAGTT	78365828	78366403	58
		GCCTTGTTTATGCAACCCTGT	ACATAAGGGGACCAATCAGTC	78366189	78366776	58
		TGACTTCAAGTGATCCACCTG	TACGCTGACAGCTCTCCTTCTGAAT	78366617	78367417	58
ex69	ex68	AGACAGGGTTTCGCCATGT	TACGCTGACAGCTCTCCTTCTGAAT	78366966	78367417	58
ex69 UTR	ex68 UTR	CCTGAGAGACACTCTCGTAAGTTACAT	TCATTACTGCGTGTGTGGCT	78367145	78367633	58
		CGAGCTGTTTCTGAACCATGT	GCAAAGAACTGCCAGAACCA	78367471	78368109	58
		TTGTGAAAGGCACTGGACTTG	ATAGGCAGTCGGAATGCAGATC	78367936	78368731	58
		TGCCACCAGTGTCTGATGAA	TGTAAGCGTTTCAGTCCCAGA	78368580	78369374	58
		TCCTTTAGAAGCACCCATGA	AAACTCCCAGGCTCAAGCAAT	78369200	78369994	58
		CCTTGGTGGTGATTTACCTGA	CTTTCCTGGCGCTTGTTTTTC	78369849	78370519	58
PCMTD1
NM_052937.2
Exon 8		TCAGGAGTTAAAGAGACCTGCCTA	CAAATCTGTAAGGAATCAGAAAAGGAT	52733930	52732608	60
ex, exon; int, intron; UTR, untranslated region
