# Supplementary material for: Identification of RNF213 as a Susceptibility Gene for Moyamoya Disease and Its Possible Role in Vascular Development
Source: PLoS One. 2011 Jul 20;6(7):e22542. doi: 10.1371/journal.pone.0022542 (PMC3140517; doi:10.1371/journal.pone.0022542)
Supplement: Table S4 — Positional candidate genes in the 1.5 Mb locus on 17q25.3 (Map Viewer: Build 37.1). (XLS) [file pone.0022542.s017.xls]

## Sheet: Table S4
Table S4. Positional candidate genes in the 1.5 Mb locus on 17q25.3 (Map Viewer : Build 37.1)
Start	Stop	Orientation	Symbol	Description
77085427	77478563	-	hCG_1776007	RNA binding protein, fox-1 homolog (C. elegans) 3
77704882	77716021	+	ENPP7	ectonucleotide pyrophosphatase/phosphodiesterase 7
77751977	77761449	+	CBX2	chromobox homolog 2 (Pc class homolog, Drosophila)
77768176	77770915	-	CBX8	chromobox homolog 8 (Pc class homolog, Drosophila)
77774397	77776328	+	LOC100507425	hypothetical LOC100507425
77806955	77813213	-	CBX4	chromobox homolog 4 (Pc class homolog, Drosophila)
77913819	78009647	-	TBC1D16	TBC1 domain family, member 16
78010435	78074412	+	CCDC40	coiled-coil domain containing 40
78075355	78093679	+	GAA	glucosidase, alpha; acid
78109013	78120982	-	EIF4A3	eukaryotic translation initiation factor 4A, isoform 3
78152281	78182851	+	CARD14	caspase recruitment domain family, member 14
78183079	78194199	-	SGSH	N-sulfoglucosamine sulfohydrolase
78194200	78227308	+	SLC26A11	solute carrier family 26, member 11
78234667	78370086	+	RNF213	ring finger protein 213
78325630	78388968	-	LOC100294362	hypothetical LOC100294362
78388967	78411886	+	FLJ35220	hypothetical protein FLJ35220
78391217	78392679	+	LOC100507440	hypothetical LOC100507440
78440633	78450404	-	NPTX1	neuronal pentraxin I
78516003	78518934	+	RPL32P31	ribosomal protein L32 pseudogene 31
78518625	78940173	+	RPTOR	regulatory associated protein of MTOR, complex 1
78576307	78576755	-	RPL31P7	ribosomal protein L31 pseudogene 7
