# Supplementary material for: Identification of RNF213 as a Susceptibility Gene for Moyamoya Disease and Its Possible Role in Vascular Development
Source: PLoS One. 2011 Jul 20;6(7):e22542. doi: 10.1371/journal.pone.0022542 (PMC3140517; doi:10.1371/journal.pone.0022542)
Supplement: Table S6 — Primers used for SNaPshot assay. (XLS) [file pone.0022542.s019.xls]

## Sheet: Table S6
Table S6. Primers used for SNaPshot assay
Gene name	Primer	Template	SNPs	Primer name	Primer sequence	size
RNF213*	Amplification	cDNA	p.H4557H	RNF213 cex55F	5'-AGCATCTGCATTGACTGCCAT-3'	1006 bp
			p.R4810K	RNF213 cex62R	5'-TGCTGCAGTAGTCTTTGGGTA-3'
		genome	p.H4557H	RNF213 ex56F	5'-AGGCTTTGTGGAACAGCAAGT-3'	397 bp
				RNF213 ex56R	5'-CAAAACGCATAGATGGCAGCTA-3'
		genome	p.R4810K	RNF213 ex60F	5'-CTGCATCACAGGAAATGACACTG-3'	387 bp
				RNF213 ex60R	5'-TTAGGCTATAGAGCACCCATCA-3'
	Extension		p.H4557H	18H4557 extF	5'-CAGAACGCAGACCGGCCA-3'
			p.R4810K	30R4810 extF	5'-ACGTCCAGCAAGTTGAATACAGCTCCATCA-3'
