# Supplementary material for: Identification of RNF213 as a Susceptibility Gene for Moyamoya Disease and Its Possible Role in Vascular Development
Source: PLoS One. 2011 Jul 20;6(7):e22542. doi: 10.1371/journal.pone.0022542 (PMC3140517; doi:10.1371/journal.pone.0022542)
Supplement: Table S9 — Association of ss179362673 with moyamoya disease with or without family histories by allelic model. (XLS) [file pone.0022542.s022.xls]

## Sheet: Table S9
Table S9. Association of ss179362673 with moyamoya disease with or without family histories by allelic modela
Family history	Marker	Chi-Squared -log10 P	Fisher's Exact -log10 P	Odds Ratio (Minor Allele)	OR Lower Confidence Bound (Minor)	OR Upper Confidence Bound (Minor)	Minor Allele Freq.	Frequency (Cases)	Frequency (Controls)	Frequency (Cases)	Frequency (Controls)	HWE P	HWE P Cases	HWE P Controls	DD Cases	DD Controls	Dd Cases	Dd Controls	dd Cases	dd Controls	D Cases	D Controls	d Cases	d Controls
Positive	ss179362673	79.5056	46.0984	84.8224	41.3526	173.988	0.0740741	0.552083	0.0143229	0.447917	0.985677	0.0108929	1.89861e-08	0.000868717	5	1	43	9	0	374	53	11	43	757
Negative	ss179362673	73.226	61.073	56.6085	29.5419	108.474	0.113682	0.451327	0.0143229	0.548673	0.985677	0.850618	7.66303e-12	0.000868717	5	1	92	9	16	374	102	11	124	757
a Analyses were limited only to Japanese population. OR: odds ratio; HWE: Hardy Weinberg Equilibrium; DD: Minor allele homozygote; Dd: Heterozygote; dd: Major allele homozygote
